# Supplementary material
Source: Springer Nature journal article supplement (https://www.springermedizin.de/resource/supplementary/13690_2013_52_MOESM2_ESM.pdf/9422518)

Higher education    Secondary education  
Primary education    No education

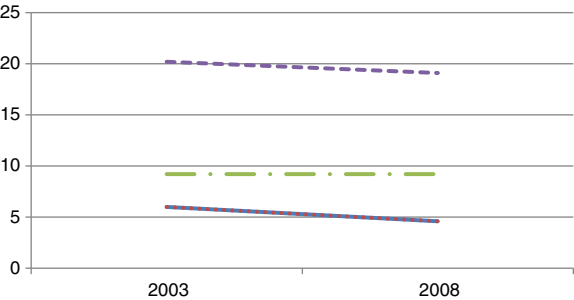

Supplement: MOESM2 [file 9422518]
